# Supplementary material
Source: PubMed Central journal article supplement (PMC10592002)
Supplement: NIHMS1929089-supplement-1.pdf [file NIHMS1929089-supplement-1.pdf]

1 **Supplemental Information**

2

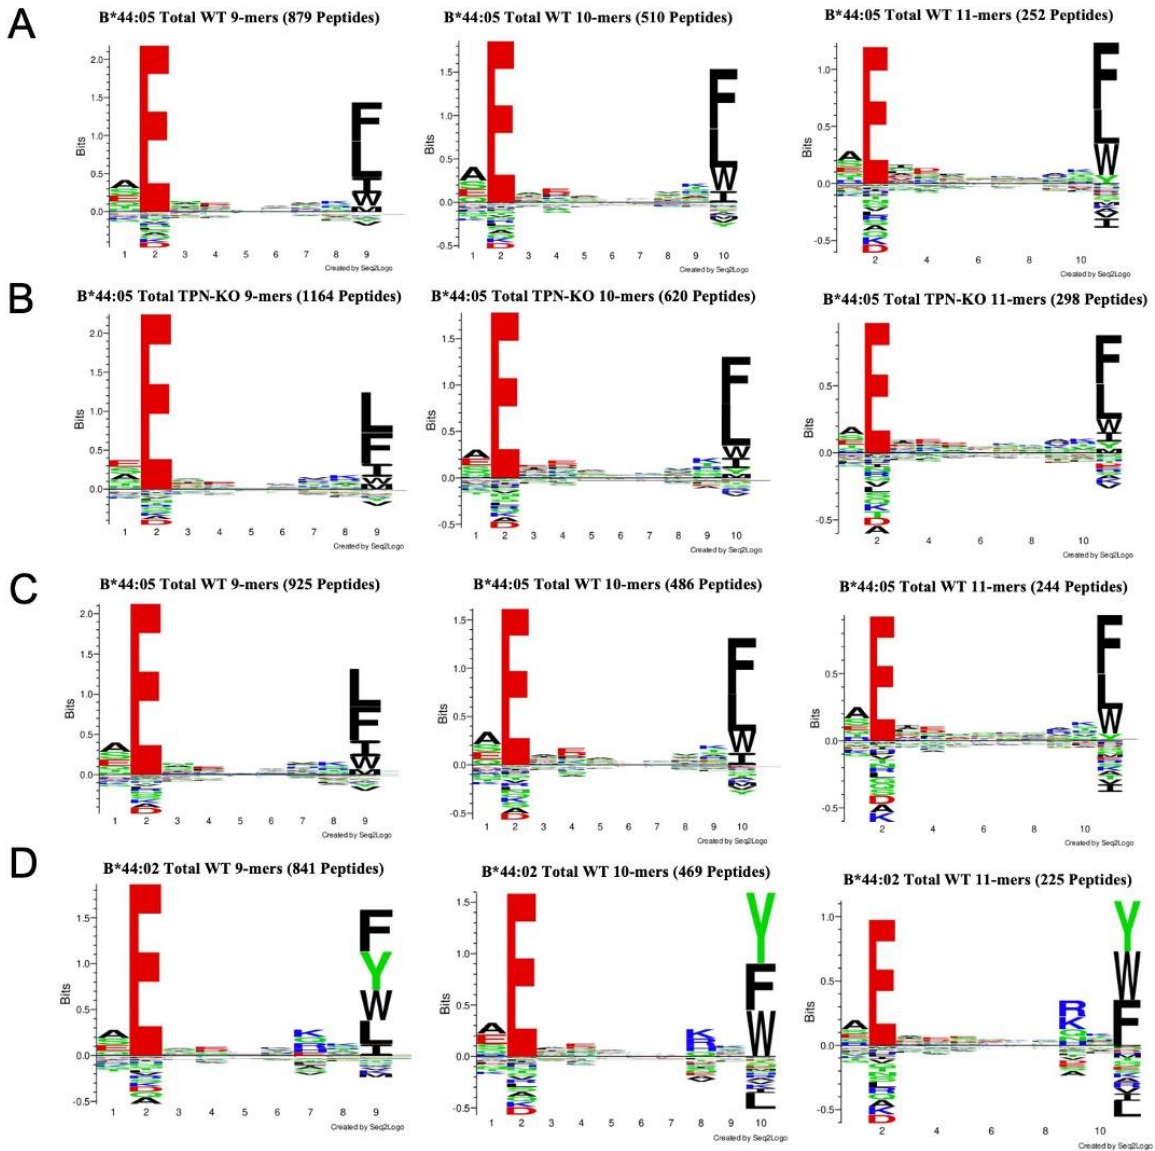

3

4 **Supplemental Figure 1. Seq2Logo motifs for the total peptide groups: A and B)** Seq2Logo

5 motifs for the total peptides for the B\*44:05-WT (A) and B\*44:05-TPN-KO (B) comparisons are

6 shown, corresponding to Figure 2. **C and D)** Seq2Logo motifs for the total set of peptides for

7 B\*44:05 (C) and B\*44:02 (D) comparisons are shown, corresponding to Figure 3.

**A** Peptide distributions: B\*44:05-WT vs. B\*44:05-TPN-KO

| Peptide Distributions               |                              |    |    |    |     |     |     |
|-------------------------------------|------------------------------|----|----|----|-----|-----|-----|
| B*44:05-TPN-KO<br>Shared and Unique | B*44:05-WT Shared and Unique |    |    |    |     |     |     |
|                                     | 6                            | 5  | 4  | 3  | 2   | 1   | 0   |
| 6                                   | 99                           | 97 | 54 | 39 | 30  | 16  | 20  |
| 5                                   | 43                           | 64 | 51 | 48 | 33  | 38  | 42  |
| 4                                   | 14                           | 49 | 53 | 59 | 64  | 62  | 70  |
| 3                                   | 13                           | 34 | 37 | 68 | 71  | 103 | 173 |
| 2                                   | 2                            | 16 | 47 | 83 | 119 | 207 | 474 |
| 1                                   | 0                            | 16 | 24 | 77 | 176 | 369 | 324 |
| 0                                   | 0                            | 4  | 19 | 68 | 181 | 313 |     |

**B** Peptide distributions: B\*44:05-WT vs. B\*44:02-WT

| Peptide Distribution         |                              |     |     |     |     |     |     |
|------------------------------|------------------------------|-----|-----|-----|-----|-----|-----|
| B*44:05-WT Shared and Unique | B*44:02-WT Shared and Unique |     |     |     |     |     |     |
|                              | 6                            | 5   | 4   | 3   | 2   | 1   | 0   |
| 6                            | 46                           | 22  | 19  | 10  | 12  | 13  | 40  |
| 5                            | 34                           | 36  | 25  | 30  | 17  | 19  | 113 |
| 4                            | 16                           | 26  | 18  | 18  | 20  | 35  | 130 |
| 3                            | 20                           | 20  | 23  | 26  | 36  | 40  | 195 |
| 2                            | 14                           | 29  | 31  | 47  | 78  | 86  | 571 |
| 1                            | 13                           | 27  | 39  | 67  | 103 | 259 | 720 |
| 0                            | 121                          | 120 | 115 | 186 | 311 | 224 |     |

14

15 **Supplemental Figure 2: Grouping of peptides into unique and shared sets:** A) The table shows  
 16 the distribution of the full set of peptides identified from six MS/MS runs grouped into those  
 17 unique to B\*44:05-WT (red), those unique to B\*44:05-TPN-KO (blue) and those shared across  
 18 both B\*44:05-WT and B\*44:05-TPN-KO conditions (green). B) The table shows the distribution  
 19 of the full set of peptides identified from six MS/MS runs grouped into those unique to B\*44:05-  
 20 WT (red), those unique to B\*44:02-WT (blue) and those shared across both B\*44:05-WT and  
 21 B\*44:02-WT conditions (green).

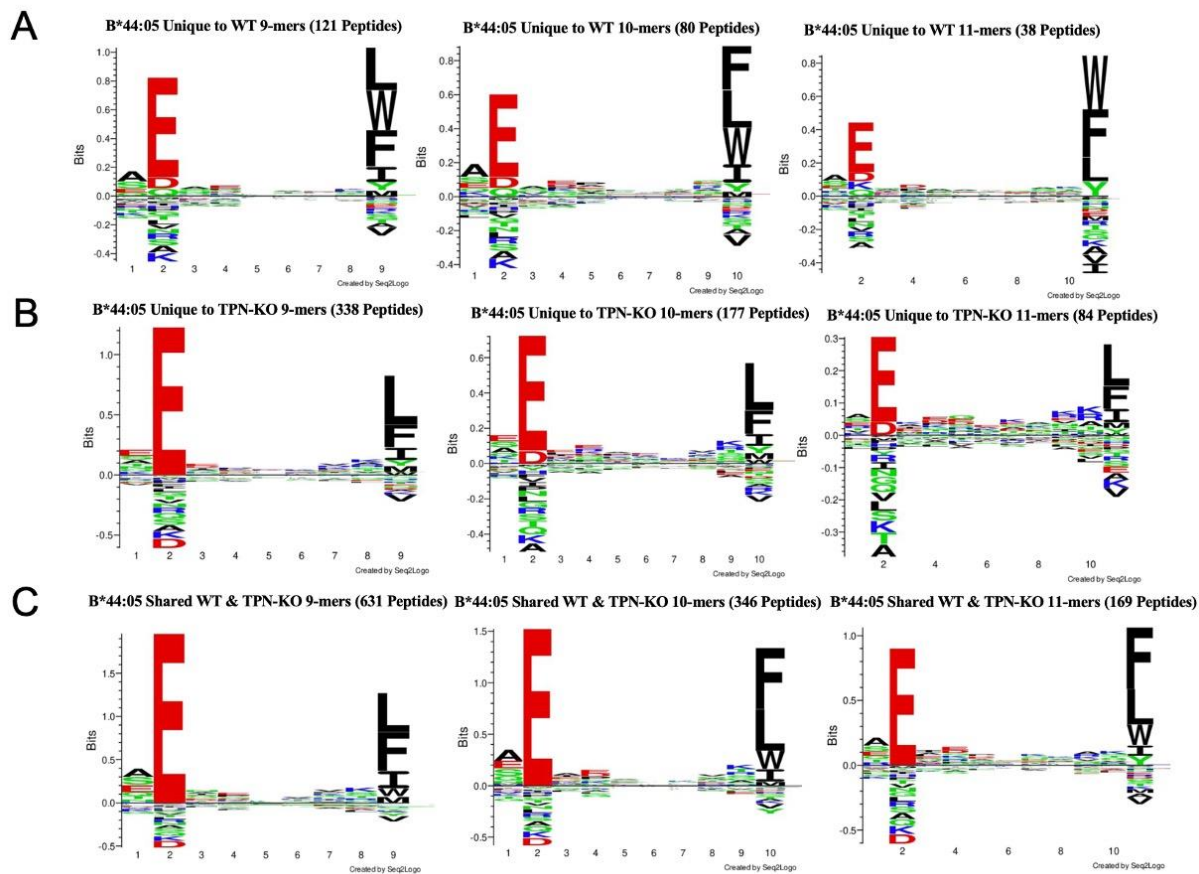

1  
2 **Supplemental Figure 3: Seq2Logo motifs for the unique and shared peptide groups in the**  
3 **B\*44:05 vs B\*44:05-Tapasin-KO comparisons: A-C)** Seq2Logo motifs for 9-mer, 10-mer, and  
4 11-mer peptides grouped into the peptides unique to B\*44:05-WT (A), unique to B\*44:05-TPN-  
5 KO (B) and shared across the two conditions (C) using the unique and shared peptide sets defined  
6 in Supplemental Figure 2A.

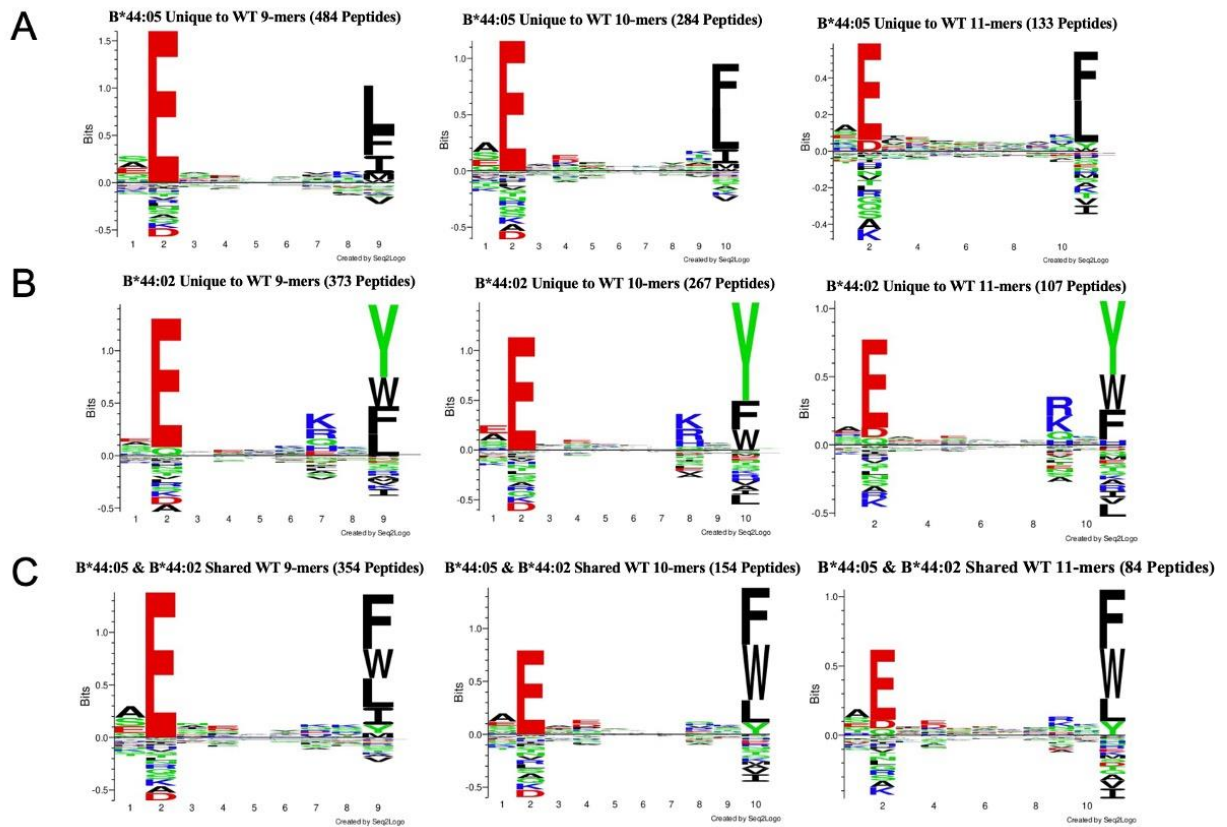

1

2 **Supplemental Figure 4: Seq2Logo motifs for the unique and shared peptide groups in the**  
 3 **B\*44:05 vs B\*44:02 comparisons: A-C) Seq2Logo motifs for 9-mer, 10-mer, and 11-mer**  
 4 **peptides among the peptides unique to B\*44:05 (A), unique to B\*44:02 (B) and shared between**  
 5 **B\*44:02 and B\*44:05 (C) using the unique and shared peptide sets defined in Supplemental Figure**  
 6 **2B.**
